# Supplementary material
Source: PubMed Central journal article supplement (PMC1373750)
Supplement: cmaj_174_4_461__1.pdf [file cmaj_174_4_461__1.pdf]

**Appendix 1: Baseline characteristics of patients with and without coronary artery disease (CAD)\***

| Characteristic                         | Patient group; mean (SD)† |                  | p value |
|----------------------------------------|---------------------------|------------------|---------|
|                                        | No CAD<br>n = 263         | CAD<br>n = 824   |         |
| Age, yr                                | 57.6 (0.78)               | 61.6 (0.38)      | < 0.001 |
| TC, mmol/L                             | 5.12 (0.07)               | 5.17 (0.04)      | 0.17    |
| LDL-C, mmol/L                          | 3.73 (0.06)               | 3.57 (0.03)      | 0.07    |
| HDL-C, mmol/L                          | 1.05 (0.02)               | 0.95 (0.01)      | < 0.001 |
| TC:HDL-C ratio                         | 5.22 (0.12)               | 5.83 (0.08)      | < 0.001 |
| Triglycerides, mmol/L, mean (IQR)      | 1.33 (0.96-1.96)          | 1.60 (1.19-2.25) | < 0.001 |
| Apolipoprotein B, g/L                  | 0.92 (0.02)               | 0.98 (0.01)      | 0.003   |
| Waist circumference, cm                | 87 (2)                    | 93 (1)           | 0.004   |
| CRP, mg/L, median (IQR)                | 1.92 (0.79-4.35)          | 2.00 (0.89-5.63) | 0.06    |
| SAA, µg/L, median (IQR)                | 254 (101-485)             | 282 (107-792)    | 0.27    |
| IL-6, ng/L, median (IQR)               | 2.12 (1.12-3.49)          | 2.30 (1.44-3.80) | 0.10    |
| tHcy, µmol/L, median (IQR)             | 13.2 (10.5-16.6)          | 14.2 (11.3-17.7) | 0.010   |
| <b>Categorical variables, no. (%)‡</b> |                           |                  |         |
| Women                                  | (40)                      | (60)             | < 0.001 |
| Men                                    | (18)                      | (82)             |         |
| Has never smoked                       | (34)                      | (66)             | < 0.001 |
| Has smoked or does smoke               | (19)                      | (81)             |         |
| No diabetes                            | (27)                      | (73)             | < 0.001 |
| Diabetes                               | (12)                      | (88)             |         |
| No hypertension                        | (26)                      | (74)             | 0.11    |
| Hypertension                           | (21)                      | (79)             |         |
| Alcohol consumption                    |                           |                  |         |
| Never                                  | (27)                      | (73)             | 0.23    |
| 1-5 drinks/wk                          | (22)                      | (78)             |         |
| 6-10 drinks/wk                         | (24)                      | (76)             |         |
| > 10 drinks/wk                         | (35)                      | (65)             |         |

Note: SD = standard deviation, TC = total cholesterol, LDL-C = low-density lipoprotein cholesterol, HDL-C = high-density lipoprotein cholesterol, IQR = interquartile range, CRP = C-reactive protein, SAA = serum amyloid A protein, tHcy = total homocysteine.

\*Presence of CAD was defined as ≥ 1 lesions of > 10% stenosis; patients with lesions of < 10% stenosis were considered negative for CAD.

†Unless stated otherwise.

‡Percentages are based on row totals.
