# Supplementary material
Source: PubMed Central journal article supplement (PMC1373750)
Supplement: cmaj_174_4_461__2.pdf [file cmaj_174_4_461__2.pdf]

**Appendix 2: Receiver operating characteristic curve analyses for plasma biomarkers and all-cause death**

| Variable                                     | AUC (95% CI)      | <i>p</i> value* |
|----------------------------------------------|-------------------|-----------------|
| Total cholesterol (TC)                       | 0.478 (0.43-0.53) | 0.34            |
| High-density lipoprotein cholesterol (HDL-C) | 0.509 (0.46-0.56) | 0.71            |
| TC:HDL-C ratio                               | 0.482 (0.44-0.53) | 0.41            |
| Low-density lipoprotein cholesterol          | 0.506 (0.46-0.55) | 0.80            |
| Triglyceride                                 | 0.468 (0.42-0.51) | 0.16            |
| Apolipoprotein B                             | 0.487 (0.44-0.53) | 0.57            |
| C-reactive protein                           | 0.587 (0.54-0.63) | 0.002           |
| Serum amyloid A protein                      | 0.591 (0.55-0.63) | < 0.001         |
| Interleukin-6                                | 0.641 (0.60-0.68) | < 0.001         |
| Total homocysteine                           | 0.632 (0.59-0.68) | < 0.001         |

Note: AUC = area under the receiver operating characteristic curve.  
 \**p* value, null hypothesis, AUC = 0.50
