# Supplementary material
Source: PubMed Central journal article supplement (PMC1373750)
Supplement: cmaj_174_4_461__3.pdf [file cmaj_174_4_461__3.pdf]

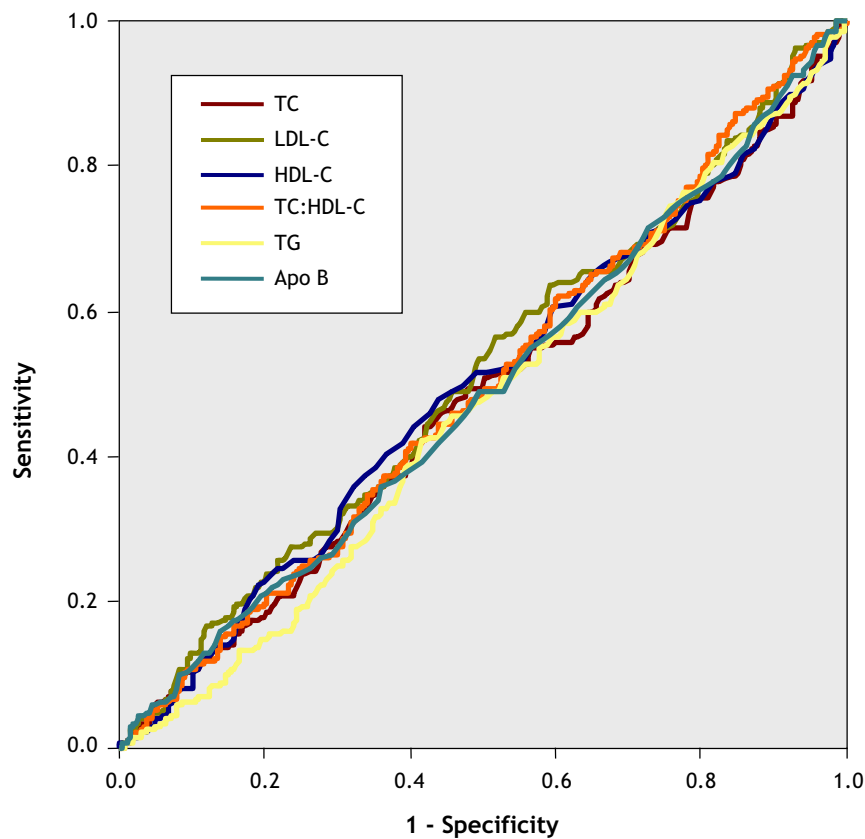

**Appendix 3:** Receiver operating characteristic curves for baseline lipid variables as predictors for all-cause death. For each variable, the sensitivity of the assay to predict death is plotted versus 1-specificity. TC = total cholesterol, LDL-C = low-density lipoprotein cholesterol, HDL-C = high-density lipoprotein cholesterol, TC:HDL-C = total cholesterol:high-density lipoprotein cholesterol ratio, TG = triglycerides, Apo B = apolipoprotein B.
