# Supplementary material
Source: PubMed Central journal article supplement (PMC1373750)
Supplement: cmaj_174_4_461__4.pdf [file cmaj_174_4_461__4.pdf]

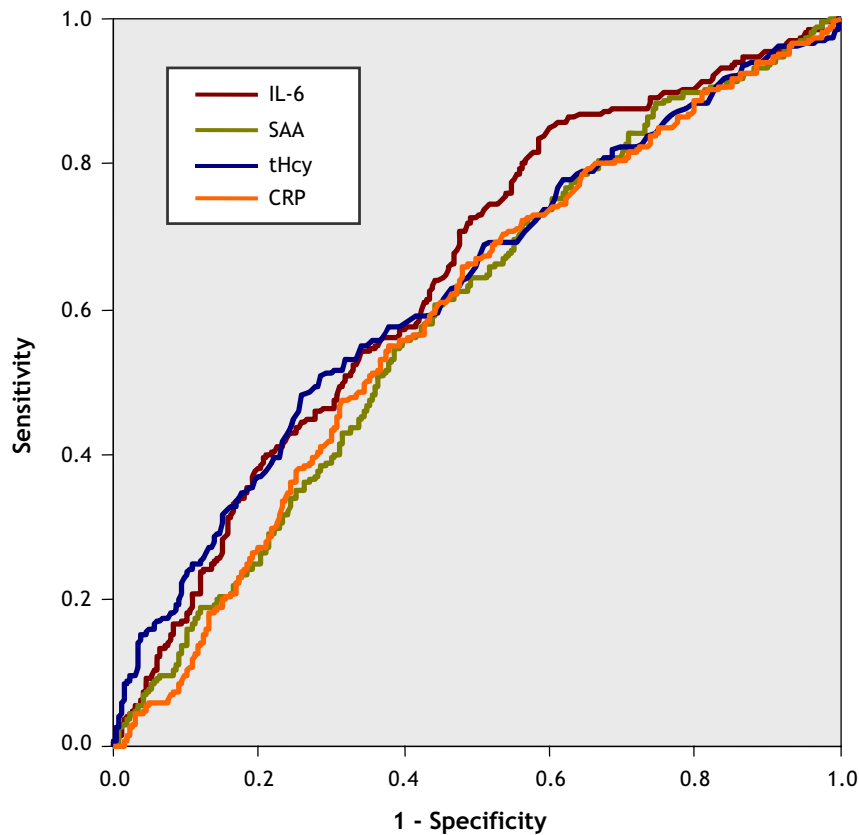

**Appendix 4:** Receiver operating characteristic curves for baseline measurements of interleukin-6 (IL-6), serum amyloid A protein (SAA), C-reactive protein (CRP) and total homocysteine (tHcy) as predictors of all-cause death. For each variable, the sensitivity of the assay to predict death is plotted versus 1-specificity.
